# Supplementary material
Source: Springer Nature journal article supplement (https://www.springermedizin.de/resource/supplementary/12958_2012_1006_MOESM2_ESM.pdf/9566588)

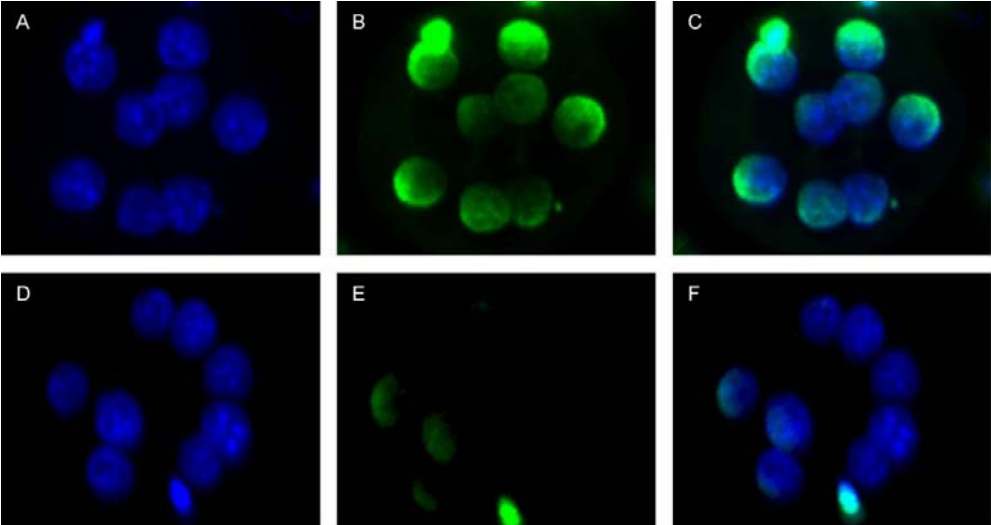

G

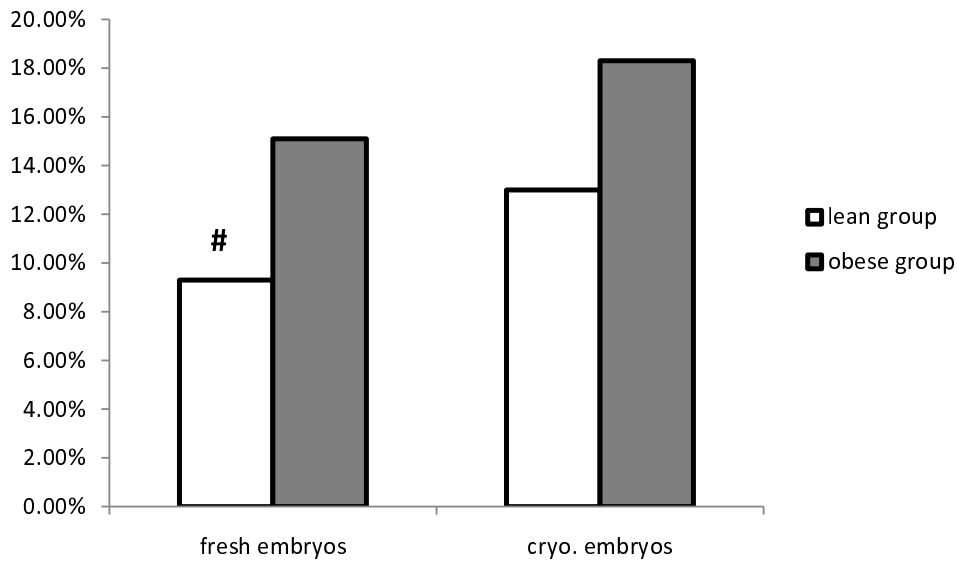

Supplement: MOESM2 [file 9566588]
